# Supplementary material
Source: MDPI journal article supplement (https://www.mdpi.com/2227-7102/13/11/1078)
Supplement: s1 [file s1]

## Supplementary Material

For article: Prerequisites of Good Cooperation between Teachers and School Psychologist: A Qualitative Analysis.

**Table S1.** *Basic socio-demographic data of school psychologists*

|              | Gender | Age | Work at school | Contract  | Experience in school psychology | Experience outside | # of students at school | Type of school |
|--------------|--------|-----|----------------|-----------|---------------------------------|--------------------|-------------------------|----------------|
| <b>SP 1</b>  | woman  | 69  | 3 years        | 0.5       | 10 years                        | 42 years           | 100                     | PS             |
| <b>SP 2</b>  | woman  | 42  | 3 years        | 0.5       | 3 years                         | 12 years           | 400                     | PS             |
| <b>SP 3</b>  | man    | 37  | 2 years        | 0.5       | 4 years                         | 9 years            | 600                     | PS             |
| <b>SP 4</b>  | man    | 69  | 13 years       | 0.5       | 14 years                        | 7 years            | 540                     | GS             |
| <b>SP 5</b>  | woman  | 29  | 3 years        | 1.0       | 3 years                         | 1 year             | 450                     | PS             |
| <b>SP 6</b>  | woman  | 64  | 10 years       | 0.5       | 10 years                        | 14 years           | 380                     | PS             |
| <b>SP 7</b>  | woman  | 26  | 2 years        | 1.0       | 2 years                         | 0 years            | 750                     | PS             |
| <b>SP 8</b>  | woman  | 27  | 2.5 years      | 0.5 - 1.0 | 2.5 years                       | 0 years            | 500                     | PS             |
| <b>SP 9</b>  | woman  | 26  | 2 years        | 2x0.5     | 2 years                         | 0 years            | 250/500                 | PS             |
| <b>SP 10</b> | woman  | 29  | 3 years        | 1.0       | 4 years                         | 0 years            | 450                     | PS             |

SP – school psychologist; type of school: PS – primary school, GS – grammar school

**Table S2.** *Basic socio-demographic data of teachers*

|           | Gender | Age | Work at school | Experience in teaching | Position     | # of students at school | Type of school |
|-----------|--------|-----|----------------|------------------------|--------------|-------------------------|----------------|
| <b>T1</b> | woman  | 36  | 13 years       | 13 years               | C            | 650                     | PS             |
| <b>T2</b> | woman  | 45  | 11 years       | 22 years               | HT primary   | 350                     | PS             |
| <b>T3</b> | woman  | 56  | 22 years       | 22 years               | C            | 155                     | Pr PS          |
| <b>T4</b> | woman  | 41  | 4 years        | 15 years               | HT           | 480                     | GS             |
| <b>T5</b> | woman  | 30  | 5 years        | 8 years                | HT           | 250                     | Pr GS          |
| <b>T6</b> | woman  | 44  | 20 years       | 20 years               | HT middle    | 800                     | PS             |
| <b>T7</b> | woman  | 47  | 5 years        | 21 years               | HT middle, C | 520                     | PS             |
| <b>T8</b> | woman  | 28  | 6 years        | 6 years                | HT           | 82                      | PS             |

T - teacher; position: C – counsellor, HT – homeroom teacher; type of school: PS – primary school, G – grammar school, Pr – private school

**Table S3.** *Core of the interview for school psychologists and educators*

| Area | Interview for school psychologists                       | Interview for teachers                                  |
|------|----------------------------------------------------------|---------------------------------------------------------|
| 1.   | Professional and informal relations with Ts              | Professional and informal relations with SPs            |
| 2.   | Examples of difficult cooperation with Ts                | Examples of difficult cooperation with SPs              |
| 3.   | Examples of easy cooperation with Ts                     | Examples of easy cooperation with SPs                   |
| 4.   | Positive characteristics for cooperation with Ts         | Positive characteristics for cooperation with SPs       |
| 5.   | Negative characteristics for cooperation with Ts         | Negative characteristics for cooperation with SPs       |
| 6.   | Advice for cooperation between Ts and SPs for future SPs | Advice for cooperation between Ts and SPs for future Ts |
| 7.   | Factors for good cooperation between Ts and SPs          |                                                         |
| 8.   | Factors causing issues in cooperation between Ts and SPs |                                                         |
| 9.   | The process of accepting SPs at a given school           |                                                         |

SP – school psychologist, T – teacher

**Table S4.** *Coding example (Teacher 1 interview excerpt)*

**Q: What contributed to the acceptance of the school psychologist by the teachers?**

| part of the text                                                                                                                                                                                                                                                                                                                       | codes                                                                                                       | subcategory                                         | category                            |
|----------------------------------------------------------------------------------------------------------------------------------------------------------------------------------------------------------------------------------------------------------------------------------------------------------------------------------------|-------------------------------------------------------------------------------------------------------------|-----------------------------------------------------|-------------------------------------|
| I think that the first thing was that something was achieved. That it was possible to improve the situation of a child or communicate better with that child or the parents.                                                                                                                                                           | visible results of SP's work                                                                                | professional competence of SP                       | SP's characteristics influence      |
| Then I think that it is definitely some kind of collegial support. That means that one teacher said "hey, Jana was good, let her come to your class, she will give you a different insight".                                                                                                                                           | recommendation of the other teacher                                                                         | supporting third party (teacher)                    | other people influence              |
| And then I think that the fact that we started to be more open, like teachers to each other, so it means that we start to trust each other, that the support is there, that it is not a competition between us. So that trust can also be seen in the relation to the psychologist.                                                    | deepening cooperation among teachers<br>mutual trust                                                        | mutual cooperation of teachers                      | school climate influence            |
| Maybe also adaptation courses - because they both started going there and create a program for the students, so they meet together. And the relationship is simply based on friendship. That they just started to trust each other there. So a lot of factors.                                                                         | informal activities<br>trust gaining                                                                        | cultivating informal relationships in the workplace | school climate influence            |
| And of course, the principal - he was convinced that the work of a school psychologist is meaningful for our school. And so he presented it to the teachers as well.                                                                                                                                                                   | introduction of the SP to teachers by principal<br>principal's conviction about meaningfulness of SP's work | management creates positive conditions for SP       | school management influence         |
| Of course, it's also about the teacher's attitude. I'm not saying that everyone gets along with her. Of course, they don't always agree with what the psychologist says, because there are teachers who have been rigid for many years and don't want to change much. But I think she's being received pretty well now among teachers. | cooperative teachers<br>uncooperative teachers                                                              | attitude of teacher towards SP                      | teachers' characteristics influence |
